# Supplementary material for: WW domain-binding protein 2 acts as an oncogene by modulating the activity of the glycolytic enzyme ENO1 in glioma
Source: PubMed Central journal article supplement (PMC5832848; doi:10.1038/s41419-018-0376-5), 2018-03-01
Supplement: 41419_2018_376_MOESM1_ESM.pdf [file 41419_2018_376_MOESM1_ESM.pdf]

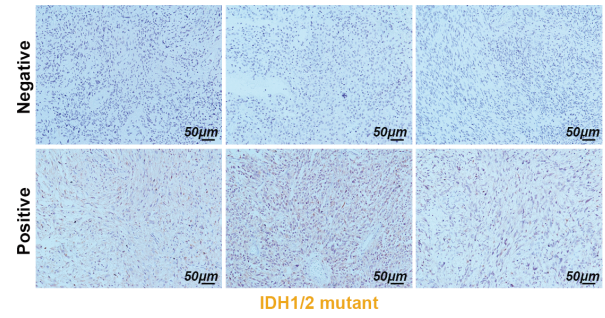

**Fig. S1. Immunohistochemical staining of IDH1/2 mutant in tissue microarray of human brain tumour.**

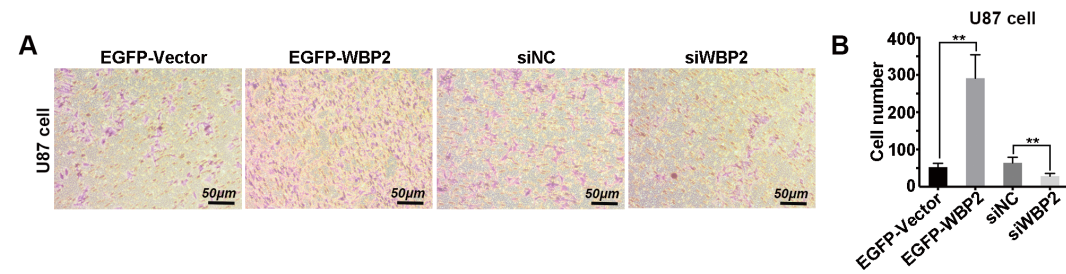

**Fig. S2. Effects of WBP2 on the migration rate of GBM. (A)** Efficiency of WBP2 on the migration ability in U87 cells was determined by transwell assay. Scale bar, 50  $\mu$ m. **(B)** Cells on the lower surface of the membrane quantified and analyzed with five randomly selected fields.  $**P<0.01$ .

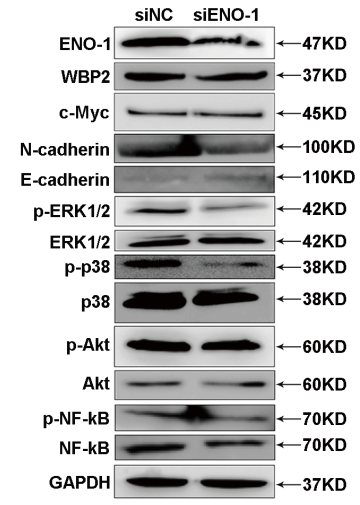

**Fig. S3. Effects of ENO1 on the expression of WBP2 and the downstream signaling pathway.**

**Supplementary Table 1 Primers for quantitative real-time PCR**

| <b>Gene</b>  | <b>Forward sequence (5'-3')</b> | <b>Reverse sequence (5'-3')</b> |
|--------------|---------------------------------|---------------------------------|
| <b>WBP2</b>  | GCGGAGTGATCGTCAATAACA           | GACCCGGTAAGGGGTAAGGT            |
| <b>ENO1</b>  | GCCTCCTGCTCAAAGTCAAC            | AACGATGAGACACCATGACG            |
| <b>Gapdh</b> | GGAGCGAGATCCCTCCAAAAT           | GGCTGTTGTCATACTTCTCATGG         |
